# Supplementary material for: Fast, highly chromatic, electrically responsive photonic crystal inks for displays
Source: Royal Society of Chemistry journal article supplement (doi:10.1039/d3tc04472f), 2024-01-01
Supplement: d3tc04472f1.pdf [file d3tc04472f1.pdf]

## Supporting information

### **Fast, high chromatic, electrically responsive photonic crystal inks for displays**

Dong Wang<sup>a, b, c</sup>, Xiaohui Sun<sup>a, b</sup>, Wei Wu<sup>a, b</sup>, Mang Li<sup>a, b</sup>, Xueying Zhao<sup>a, b</sup>, Huiqi Ren<sup>c</sup>, Bo Wang<sup>a, b</sup>,  
Jingfang Li<sup>d</sup>, Xuyang Zhang<sup>a, b, \*</sup>, Guohua Wu<sup>a, b, c, \*</sup>, Xiangwei Wang<sup>a, b, \*</sup>

<sup>a</sup> College of Materials Science and Chemical Engineering, Harbin Engineering University, Harbin 150001,  
China

<sup>b</sup> Qingdao Innovation and Development Center of Harbin Engineering University, Qingdao 266000,  
China

<sup>c</sup> Defense Engineering Institute, Academy of Military Sciences, People's Liberation Army of China,  
Luoyang 471023, China

<sup>d</sup> School of Science, Chongqing University of Posts and Telecommunications, Chongqing 400065, China

<sup>e</sup> The Key Laboratory of Functional Molecular Solids, Ministry of Education, China

\*Correspondence to: X. Zhang (xuyangz@hrbeu.edu.cn), G. Wu (ghwu@hrbeu.edu.cn) and X. Wang  
(wangxiangwei@hrbeu.edu.cn)

**Table S1** Comparison of the various ERPCs in literature works and this work: the chemical composition, the working electric field, and the corresponding required time to shift 35nm from the initial state.

| Particles <sup>a</sup>                          | d <sub>p</sub> (nm) | f <sub>p</sub> (%) | Solvent          | E(10 <sup>4</sup> V/m) | U(V) | Thickness(μm) | Time(s) |
|-------------------------------------------------|---------------------|--------------------|------------------|------------------------|------|---------------|---------|
| PMMA-co-PS <sup>S1</sup>                        | 137                 | /                  | H <sub>2</sub> O | 2.50                   | 2.5  | 100           | 80      |
| SiO <sub>2</sub> <sup>S2</sup>                  | 120                 | 10                 | PCb              | 1.25                   | 2.5  | 200           | 60      |
| PS <sup>S3</sup>                                | 138                 | /                  | H <sub>2</sub> O | /                      | AC   | 100           | 9       |
| Fe <sub>3</sub> O <sub>4</sub> @C <sup>S4</sup> | 130                 | 18                 | PCb              | 2.70                   | 2.7  | 100           | 60      |
| SiO <sub>2</sub> <sup>S5</sup>                  | 200                 | 20                 | PCb              | 2.50                   | 2.5  | 100           | 20      |
| SiO <sub>2</sub> <sup>S6</sup>                  | 171                 | 18                 | aniline          | 1.00                   | 1.0  | 100           | 10      |
| SiO <sub>2</sub>                                | 189                 | 25                 | PCb              | 1.25                   | 2.5  | 200           | 5       |

Note<sup>a</sup>: These f<sub>p</sub> values referred to the weight percentages of colloidal particles, and the data in the table corresponds to an electric field of 1.00-2.70\*10<sup>4</sup> V/m. Some particles in the literature can achieve faster response times under high electric field.

**Table S2** The recipes of the SiO<sub>2</sub> based liquid photonic crystals.

| Sample <sup>b</sup> | SiO <sub>2</sub> (%) | SiO <sub>2</sub> (μL) | PC (μL) | Black (%) |
|---------------------|----------------------|-----------------------|---------|-----------|
| A                   | 15.0                 | 30.0                  | 170.0   | 0         |
| B                   | 20.0                 | 40.0                  | 160.0   | 0         |
| C                   | 25.0                 | 50.0                  | 150.0   | 0         |
| D                   | 30.0                 | 60.0                  | 140.0   | 0         |
| E                   | 25.0                 | 50.0                  | 150.0   | 0.025     |
| F                   | 25.0                 | 50.0                  | 150.0   | 0.050     |
| G                   | 25.0                 | 50.0                  | 150.0   | 0.100     |

Note<sup>b</sup>: The density of SiO<sub>2</sub> microspheres is 2.0 g/cm<sup>3</sup>, the density of ethanol is 0.79 g/cm<sup>3</sup>, Black (%) refers to the mass percentage of black substance in SiO<sub>2</sub>

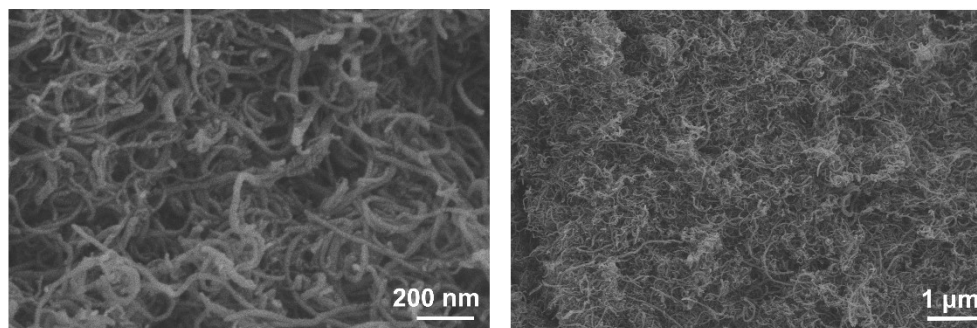

**Fig. S1.** SEM images of ACNTs.

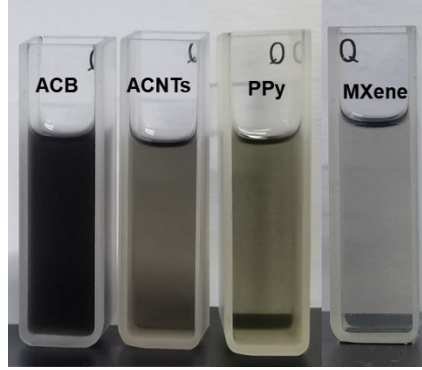

**Fig. S2.** Optical images of suspensions of four black substances (ACB, ACNTs, PPy and MXene) with mass fraction of 0.01% in ethanol.

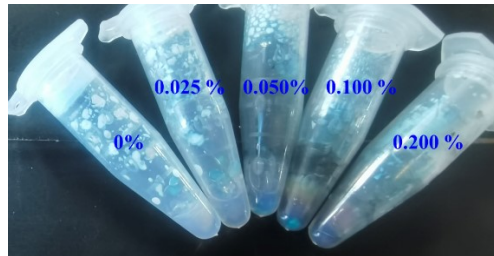

**Fig. S3.** Optical images of SiO<sub>2</sub> based liquid photonic crystals (LPCs) with different contents of ACNTs.

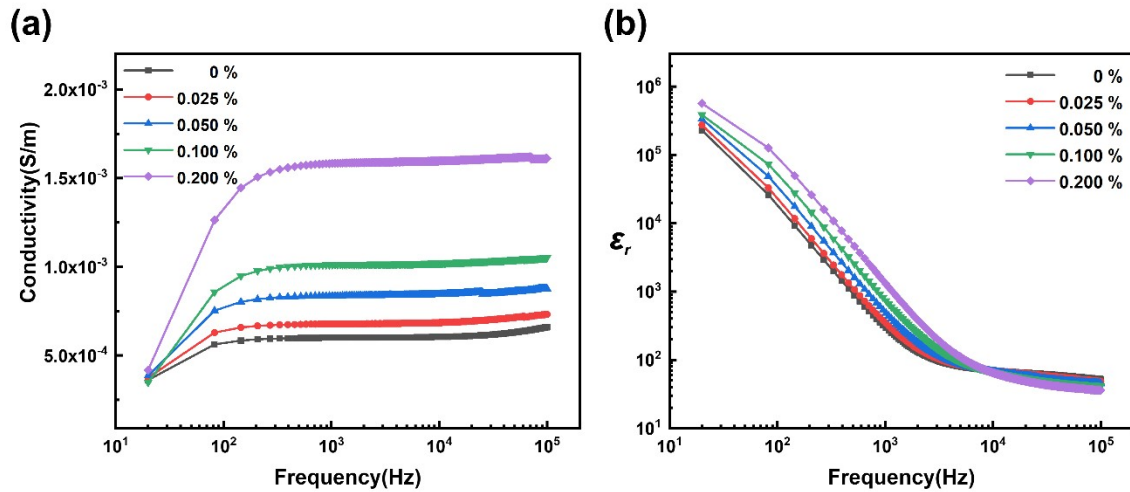

**Fig. S4.** (a) Conductive spectra of SiO<sub>2</sub> based LPCs with different ACNTs additions; (b) relative dielectric constant spectra of SiO<sub>2</sub> based LPCs with different ACNTs additions.

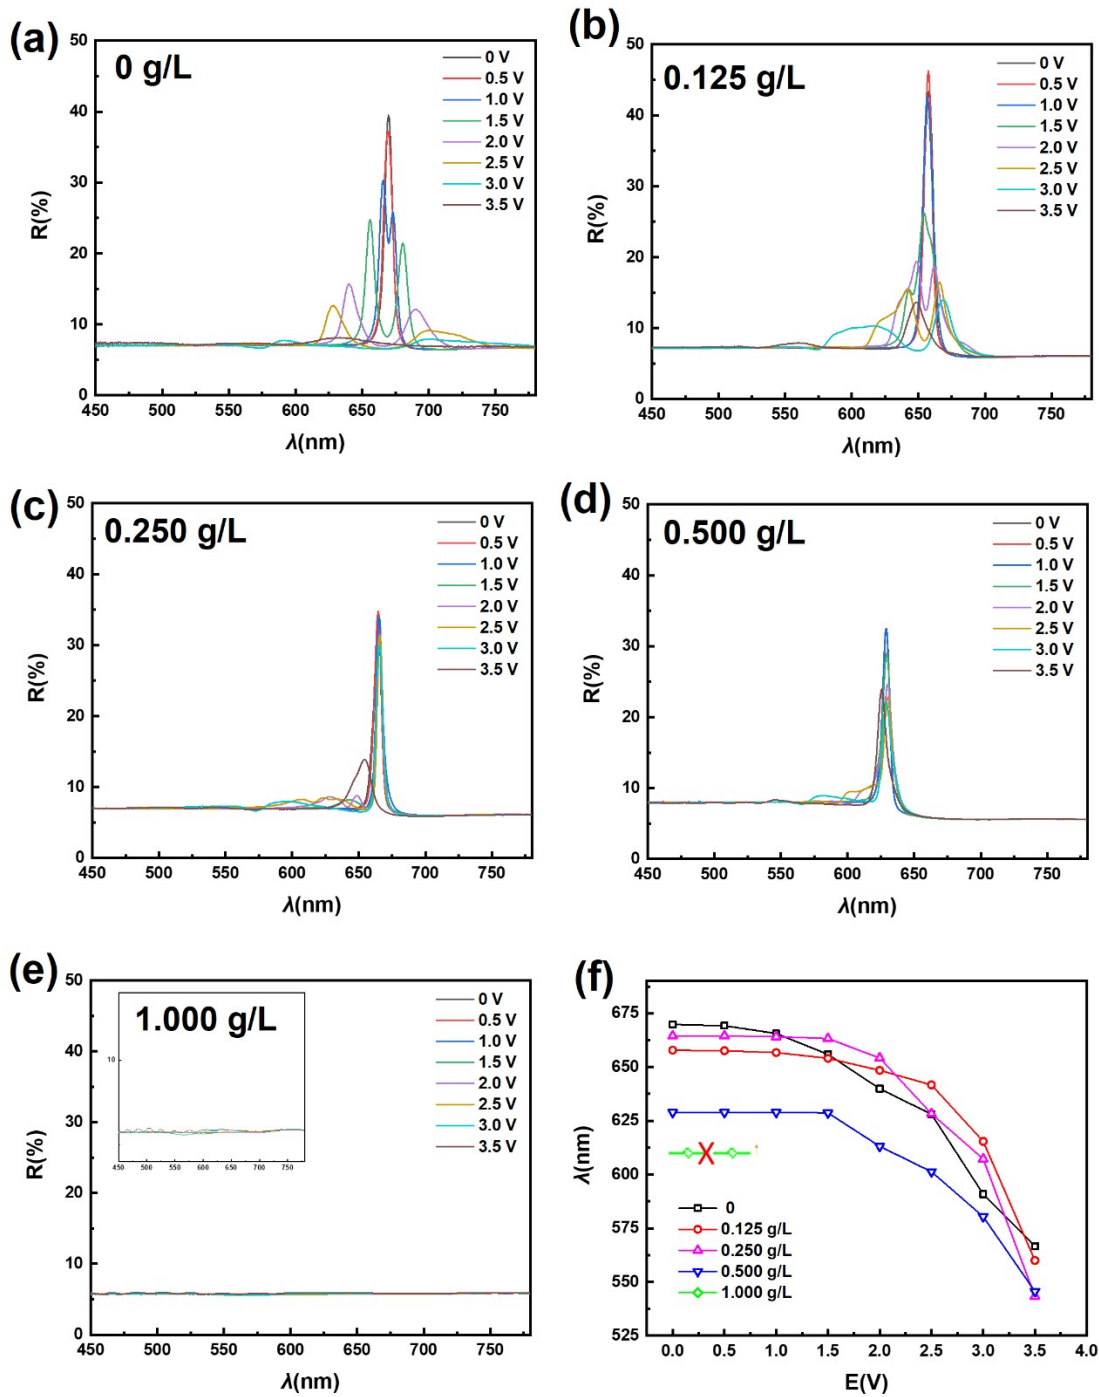

**Fig. S5.** Reflection spectra of SiO<sub>2</sub> based ERPCs with different SDBS concentration as the electric field increases from 0 to 3.5 V: (a) 0 g/L, (b) 0.125 g/L, (c) 0.250 g/L, (d) 0.500 g/L, (e) 1.000 g/L; (f) the reflection wavelength of SiO<sub>2</sub> based ERPCs with SDBS as the electric field increases from 0 to 3.5 V.

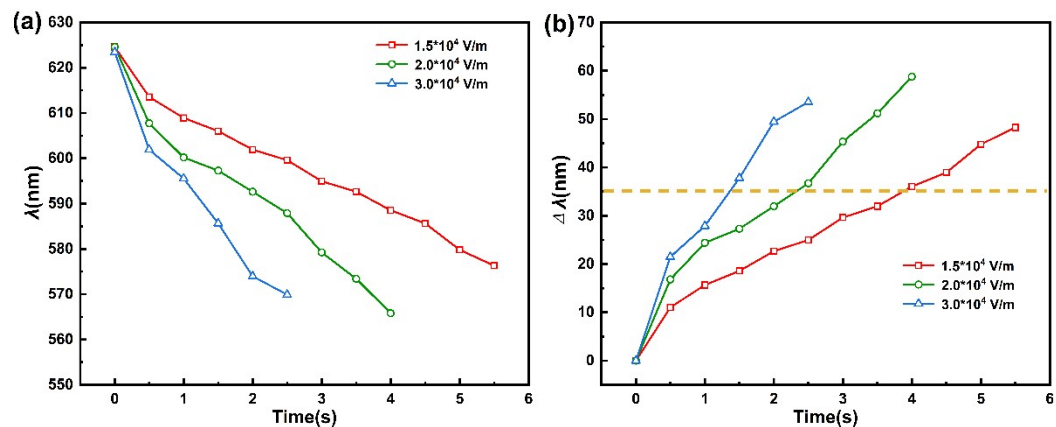

**Fig. S6.** The reflection wavelength changes of SiO<sub>2</sub> based ERPCs with SDBS: when electric voltages of 3.0 V, 4.0 V and 6.0 V are applied (yellow dashed line as reference wavelength for comparison).

## References

- S1. M. G. Han, C. J. Heo, C. G. Shin, H. S. Shim, J. W. Kim, Y. W. Jin and S. Y. Lee, *J. Mater. Chem. C*, 2013, **1**, 5791-5798.
- S2. Y. X. Luo, J. F. Zhang, A. H. Sun, C. Y. Chu, S. Zhou, J. J. Guo and G. J. Xu, *Adv. Mater. Res.* 2014, **924**, 158-165.
- S3. M. G. Han, C. J. Heo, H. Shim, C. G. Shin, S. J. Lim, J. W. Kim, Y. W. Jin and S. Lee, *Adv. Opt. Mater.*, 2014, **2**, 535-541.
- S4. H. Y. Lee, S. H. Kim, H. N. Lee, K. H. Park, Y. S. Kim and G. R. Yi, *Rsc Adv.*, 2016, **6**, 100167-100173.
- S5. Y. Ren, Y. Guo, Y. Cheng, Y. Chu, Y. Fang, Y. Liu, J. Hou and Z. Liu, *Optical Materials*, 2022, **129**, 112508.
- S6. G. Bao, W. Yu, Q. Fu and J. Ge, *J. Mater. Chem. C*, 2023, **11**(10) 3513-3520.
